# Supplementary material for: Identification and Functional Prediction of Long Non-Coding RNA in Longissimus Dorsi Muscle of Queshan Black and Large White Pigs
Source: MDPI journal article supplement (doi:10.3390/genes14010197), 2023-01-12
Supplement: s1 [file s1]

**Table S1.** GO biological processes analysis of DE lncRNAs co-location of targeted DE mRNAs (15 terms).

| Term                                                      | Database      | ID         | Input number | Background number | P-Value  | Corrected P-Value | Input                                                                                                       |
|-----------------------------------------------------------|---------------|------------|--------------|-------------------|----------|-------------------|-------------------------------------------------------------------------------------------------------------|
| protein binding                                           | Gene Ontology | GO:0005515 | 7            | 11779             | 0.001296 | 0.019351          | <i>SQSTM1</i>   <i>RRAD</i>   <i>ZNF148</i>   <i>ATF3</i>  <br><i>TNNI1</i>   <i>SERPINE1</i>   <i>CANX</i> |
| regulation of striated muscle contraction                 | Gene Ontology | GO:0006942 | 1            | 8                 | 0.001833 | 0.019351          | <i>TNNI1</i>                                                                                                |
| negative regulation of smooth muscle cell migration       | Gene Ontology | GO:0014912 | 1            | 13                | 0.00285  | 0.019459          | <i>SERPINE1</i>                                                                                             |
| apolipoprotein binding                                    | Gene Ontology | GO:0034185 | 1            | 16                | 0.00346  | 0.019573          | <i>CANX</i>                                                                                                 |
| skeletal muscle contraction                               | Gene Ontology | GO:0003009 | 1            | 26                | 0.00549  | 0.022185          | <i>TNNI1</i>                                                                                                |
| regulation of I-kappaB kinase/NF-kappaB signaling         | Gene Ontology | GO:0043122 | 1            | 29                | 0.006099 | 0.022361          | <i>SQSTM1</i>                                                                                               |
| negative regulation of endothelial cell apoptotic process | Gene Ontology | GO:2000352 | 1            | 31                | 0.006504 | 0.022996          | <i>SERPINE1</i>                                                                                             |
| calcium channel regulator activity                        | Gene Ontology | GO:0005246 | 1            | 35                | 0.007314 | 0.023411          | <i>RRAD</i>                                                                                                 |
| cardiac muscle contraction                                | Gene Ontology | GO:0060048 | 1            | 44                | 0.009136 | 0.024652          | <i>TNNI1</i>                                                                                                |
| cellular response to amino acid starvation                | Gene Ontology | GO:0034198 | 1            | 44                | 0.009136 | 0.024652          | <i>ATF3</i>                                                                                                 |
| skeletal muscle cell differentiation                      | Gene Ontology | GO:0035914 | 1            | 45                | 0.009338 | 0.024652          | <i>ATF3</i>                                                                                                 |
| gluconeogenesis                                           | Gene Ontology | GO:0006094 | 1            | 45                | 0.009338 | 0.024652          | <i>ATF3</i>                                                                                                 |
| small GTPase mediated signal transduction                 | Gene Ontology | GO:0007264 | 1            | 94                | 0.019201 | 0.03553           | <i>RRAD</i>                                                                                                 |
| muscle contraction                                        | Gene Ontology | GO:0006936 | 1            | 105               | 0.021403 | 0.037173          | <i>TNNI1</i>                                                                                                |
| cellular response to lipopolysaccharide                   | Gene Ontology | GO:0071222 | 1            | 158               | 0.031953 | 0.047569          | <i>SERPINE1</i>                                                                                             |

**Table S2.** KEGG analysis of DE lncRNAs co-location of targeted DE mRNAs (15 pathways).

| Term                                                 | Database     | ID       | Input number | Background number | P-Value  | Corrected P-Value | Input                           |
|------------------------------------------------------|--------------|----------|--------------|-------------------|----------|-------------------|---------------------------------|
| Cellular senescence                                  | KEGG PATHWAY | hsa04218 | 2            | 160               | 0.000466 | 0.019351          | <i>SQSTM1</i>   <i>SERPINE1</i> |
| Mitophagy - animal                                   | KEGG PATHWAY | hsa04137 | 1            | 65                | 0.013374 | 0.030091          | <i>SQSTM1</i>                   |
| p53 signaling pathway                                | KEGG PATHWAY | hsa04115 | 1            | 72                | 0.014783 | 0.031986          | <i>SERPINE1</i>                 |
| Thyroid hormone synthesis                            | KEGG PATHWAY | hsa04918 | 1            | 74                | 0.015185 | 0.031986          | <i>CANX</i>                     |
| Antigen processing and presentation                  | KEGG PATHWAY | hsa04612 | 1            | 77                | 0.015789 | 0.032564          | <i>CANX</i>                     |
| Complement and coagulation cascades                  | KEGG PATHWAY | hsa04610 | 1            | 79                | 0.01619  | 0.032711          | <i>SERPINE1</i>                 |
| AGE-RAGE signaling pathway in diabetic complications | KEGG PATHWAY | hsa04933 | 1            | 100               | 0.020402 | 0.036393          | <i>SERPINE1</i>                 |
| Chagas disease (American trypanosomiasis)            | KEGG PATHWAY | hsa05142 | 1            | 103               | 0.021003 | 0.036801          | <i>SERPINE1</i>                 |
| HIF-1 signaling pathway                              | KEGG PATHWAY | hsa04066 | 1            | 109               | 0.022203 | 0.037897          | <i>SERPINE1</i>                 |
| Osteoclast differentiation                           | KEGG PATHWAY | hsa04380 | 1            | 128               | 0.025994 | 0.042164          | <i>SQSTM1</i>                   |
| Apelin signaling pathway                             | KEGG PATHWAY | hsa04371 | 1            | 137               | 0.027785 | 0.044011          | <i>SERPINE1</i>                 |
| Fluid shear stress and atherosclerosis               | KEGG PATHWAY | hsa05418 | 1            | 139               | 0.028182 | 0.044248          | <i>SQSTM1</i>                   |
| Phagosome                                            | KEGG PATHWAY | hsa04145 | 1            | 152               | 0.030764 | 0.047097          | <i>CANX</i>                     |
| Hippo signaling pathway                              | KEGG PATHWAY | hsa04390 | 1            | 154               | 0.03116  | 0.047097          | <i>SERPINE1</i>                 |
| Necroptosis                                          | KEGG PATHWAY | hsa04217 | 1            | 162               | 0.032745 | 0.047772          | <i>SQSTM1</i>                   |
| Protein processing in endoplasmic reticulum          | KEGG PATHWAY | hsa04141 | 1            | 165               | 0.033339 | 0.047772          | <i>CANX</i>                     |
| Human T-cell leukemia virus 1 infection              | KEGG PATHWAY | hsa05166 | 1            | 219               | 0.043973 | 0.060462          | <i>CANX</i>                     |

**Table S3.** GO biological processes analysis of DE lncRNAs co-expression of targeted DE mRNAs (15 terms).

| Term | Database | ID | Input number | Background number | P-Value | Corrected P-Value | Input |
|------|----------|----|--------------|-------------------|---------|-------------------|-------|
|------|----------|----|--------------|-------------------|---------|-------------------|-------|

|                                                                |               |            |    |     |          |             |                                                                                               |
|----------------------------------------------------------------|---------------|------------|----|-----|----------|-------------|-----------------------------------------------------------------------------------------------|
| protein phosphorylation                                        | Gene Ontology | GO:0006468 | 15 | 451 | 6.12E-07 | 7.71E-05    | <i>SQSTM1 TBK1 BUB1B ERCC2 SIK2 PIK3CD GRK3 HSPB8 MYLK HIPK3 MAPK1 CFL1 IRAK2 DAPK2 NRBP1</i> |
| positive regulation of NF-kappaB transcription factor activity | Gene Ontology | GO:0051092 | 9  | 159 | 1.98E-06 | 0.00017554  | <i>TRIM37 MAP3K7 IL6 TFRC CAPN3 FLOT1 FLOT2 IRAK2 CLU</i>                                     |
| positive regulation of gene expression                         | Gene Ontology | GO:0010628 | 12 | 391 | 1.79E-05 | 0.00118926  | <i>UXT TFRC ACTC1 PIK3CD WARS IL6 MAPK1 TNRC6B CLU LMNA CD3E UBR5</i>                         |
| muscle contraction                                             | Gene Ontology | GO:0006936 | 6  | 105 | 9.96E-05 | 0.003907848 | <i>TNNT3 MYH7 MYLK TLN1 SLMAP TNNI1</i>                                                       |
| glucose transmembrane transport                                | Gene Ontology | GO:1904659 | 3  | 24  | 0.000742 | 0.015709511 | <i>SLC5A10 MFSD4B SLC2A12</i>                                                                 |
| positive regulation of smooth muscle cell proliferation        | Gene Ontology | GO:0048661 | 4  | 58  | 0.000769 | 0.01600441  | <i>IL6 NR4A3 NAMPT STAT1</i>                                                                  |
| cellular response to lipopolysaccharide                        | Gene Ontology | GO:0071222 | 6  | 158 | 0.000811 | 0.016444566 | <i>UXT ANKRD1 CD274 DAB2IP IL6 SERPINE1</i>                                                   |
| skeletal muscle contraction                                    | Gene Ontology | GO:0003009 | 3  | 26  | 0.000917 | 0.016882827 | <i>TNNT3 MYH7 TNNI1</i>                                                                       |
| ubiquitin-dependent protein catabolic process                  | Gene Ontology | GO:0006511 | 8  | 292 | 0.000924 | 0.016882827 | <i>SQSTM1 BUB1B USP45 USP14 SPSB2 RNF34 UHRF1 PSMC6</i>                                       |
| regulation of myoblast differentiation                         | Gene Ontology | GO:0045661 | 2  | 6   | 0.001186 | 0.019716713 | <i>CAPN3 FLOT2</i>                                                                            |
| activation of MAPK activity                                    | Gene Ontology | GO:0000187 | 5  | 123 | 0.001656 | 0.023049353 | <i>IRAK2 PHB2 MAPK1 PLCE1 MAP3K7</i>                                                          |
| regulation of striated muscle contraction                      | Gene Ontology | GO:0006942 | 2  | 8   | 0.001889 | 0.023559435 | <i>TNNT3 TNNI1</i>                                                                            |
| lipid biosynthetic process                                     | Gene Ontology | GO:0008610 | 2  | 14  | 0.004909 | 0.041627664 | <i>AGPS ACSL1</i>                                                                             |
| regulation of cell population proliferation                    | Gene Ontology | GO:0042127 | 5  | 169 | 0.006153 | 0.046561629 | <i>CLU TFRC SQLE STAT1 STAT6</i>                                                              |
| phosphatidylinositol phosphate binding                         | Gene Ontology | GO:1901981 | 2  | 16  | 0.006204 | 0.046561629 | <i>RNF34 DENND1A</i>                                                                          |

**Table S4.** KEGG analysis of DE lncRNAs co-expression of targeted DE mRNAs (15 pathways).

| Term                                                 | Database     | ID       | Input number | Background number | P-Value  | Corrected P-Value | Input                                  |
|------------------------------------------------------|--------------|----------|--------------|-------------------|----------|-------------------|----------------------------------------|
| AGE-RAGE signaling pathway in diabetic complications | KEGG PATHWAY | hsa04933 | 6            | 100               | 7.71E-05 | 0.003296          | STAT1 PIK3CD IL6 MAPK1 PLCE1 SERPINE1  |
| Toll-like receptor signaling pathway                 | KEGG PATHWAY | hsa04620 | 6            | 104               | 9.47E-05 | 0.003843          | TBK1 STAT1 PIK3CD MAP3K7 IL6 MAPK1     |
| HIF-1 signaling pathway                              | KEGG PATHWAY | hsa04066 | 6            | 109               | 0.000121 | 0.004575          | TFRC PFKFB3 PIK3CD IL6 MAPK1 SERPINE1  |
| Thyroid hormone signaling pathway                    | KEGG PATHWAY | hsa04919 | 6            | 119               | 0.000191 | 0.006134          | MYH7 STAT1 PIK3CD MAPK1 PLCE1 SIN3A    |
| NOD-like receptor signaling pathway                  | KEGG PATHWAY | hsa04621 | 7            | 178               | 0.000245 | 0.007019          | STAT1 TBK1 CTSB NAMPT MAP3K7 IL6 MAPK1 |
| Osteoclast differentiation                           | KEGG PATHWAY | hsa04380 | 6            | 128               | 0.000278 | 0.007837          | SQSTM1 STAT1 PIK3CD CSF1R MAP3K7 MAPK1 |
| Apoptosis                                            | KEGG PATHWAY | hsa04210 | 6            | 136               | 0.00038  | 0.009668          | PIK3CD CTSB DAB2IP MAPK1 LMNA LAMB2    |
| Cellular senescence                                  | KEGG PATHWAY | hsa04218 | 6            | 160               | 0.000863 | 0.016841          | SQSTM1 PIK3CD HIPK3 IL6 MAPK1 SERPINE1 |
| Th17 cell differentiation                            | KEGG PATHWAY | hsa04659 | 5            | 107               | 0.000914 | 0.016883          | IL6 STAT6 MAPK1 CD3E STAT1             |
| Fructose and mannose metabolism                      | KEGG PATHWAY | hsa00051 | 3            | 33                | 0.001732 | 0.023432          | ARL1 PFKFB3 GMDS                       |
| Insulin signaling pathway                            | KEGG PATHWAY | hsa04910 | 5            | 137               | 0.002604 | 0.029681          | MAPK1 PIK3CD PRKAR1A FLOT2 FLOT1       |
| ECM-receptor interaction                             | KEGG PATHWAY | hsa04512 | 4            | 86                | 0.003049 | 0.033334          | AGRN TNXB CD47 FRAS1                   |
| IL-17 signaling pathway                              | KEGG PATHWAY | hsa04657 | 4            | 93                | 0.003989 | 0.03783           | IL6 MAPK1 MAP3K7 TBK1                  |
| Jak-STAT signaling pathway                           | KEGG PATHWAY | hsa04630 | 5            | 162               | 0.005187 | 0.042965          | IL6 STAT6 STAM PIK3CD STAT1            |
| T cell receptor signaling pathway                    | KEGG PATHWAY | hsa04660 | 4            | 103               | 0.005646 | 0.045355          | MAPK1 PIK3CD CD3E MAP3K7               |

**Table S5.** The primers used for the validation of lncRNAs and mRNAs.

| Primer Name      | Sequence(5'to3')      | Tm/°C | Product<br>Size/bp |
|------------------|-----------------------|-------|--------------------|
| <i>GAPDH</i> -F  | GCCAAAAGGGTCATCATCTC  | 53.6  | 287                |
| <i>GAPDH</i> -R  | GTAGAGGCAGGGATGATGTTC | 55.2  |                    |
| <i>ZNF148</i> -F | AGTCGGTGCTTCAAGATCGG  | 60.11 | 132                |
| <i>ZNF148</i> -R | TCACTGTCTCCTCATGGACC  | 58.44 |                    |
| <i>STAT6</i> -F  | CAGCCCAGATATGGTGTCCC  | 59.89 | 108                |
| <i>STAT6</i> -R  | TCCTGGAAGGCTGACAACAC  | 59.89 |                    |
| <i>ACTB</i> -F   | CTCTTCCAGCCCTCCTTCCT  | 59.32 | 177                |
| <i>ACTB</i> -R   | GGCCGTGATCTCCTTCTGCAT | 60.25 |                    |
| <i>CMYA5</i> -F  | GCCACTGAGACCTACACT    | 53.83 | 175                |
| <i>CMYA5</i> -R  | CTTCACTCTGTTCACTTGTC  | 50.35 |                    |
| <i>FHOD3</i> -F  | TTCCACCTCTTCTCCTATGA  | 51.58 | 137                |
| <i>FHOD3</i> -R  | CGGAAGTTGTAAGGTTCAGA  | 51.58 |                    |
| LNC_000040-F     | CGAATCTCCTCGTCCTGCTC  | 58.05 | 158                |
| LNC_000040-R     | ATTGTCCCAAGCAGCGGTAA  | 57.05 |                    |
| LNC_004737-F     | GCAAGTGCATTAAGGGCTCG  | 57.26 | 169                |
| LNC_004737-R     | TGGGTTCATTAAGCTCGCGT  | 56.95 |                    |
| LNC_006333-F     | ACGGGTACTGGCATTGTT    | 57.06 | 196                |
| LNC_006333-R     | AAGGGAAAGTTGGGCACACA  | 57.28 |                    |
| LNC_008264-F     | TTCTAATTCGCAACCTGAGA  | 50.43 | 163                |

---

|              |                     |       |     |
|--------------|---------------------|-------|-----|
| LNC_008264-R | CAAGCCCTAGTAGCCATT  | 51.73 |     |
| LNC_002605-F | GCCTCTGATTCACTTGACT | 51.58 |     |
| LNC_002605-R | AATGCTGCTGGACTGTTC  | 52.67 | 205 |

---
